# Supplementary material for: A protein A modified Au–graphene oxide composite as an enhanced sensing platform for SPR-based immunoassay
Source: Royal Society of Chemistry journal article supplement (doi:10.1039/c3an01553j), 2013-01-01
Supplement: c3an01553j.pdf [file c3an01553j.pdf]

Supplementary information for  
**Protein A modified Au-graphene oxide composite as an  
enhanced sensing platform for SPR-based immunoassay**

Jia Zhang <sup>a</sup>, Ying Sun <sup>a</sup>, Qiong Wu <sup>a</sup>, Hua Zhang <sup>a</sup>, Yu Bai <sup>b</sup>, Daqian Song <sup>a,\*</sup>

<sup>a</sup> College of Chemistry, Jilin University, Qianjin Street 2699, Changchun 130012,  
China

<sup>b</sup> Beijing National Laboratory for Molecular Sciences, College of Chemistry and  
Molecular Engineering, Peking University, Beijing, 100871, China

Corresponding author: e-mail: [songdq@jlu.edu.cn](mailto:songdq@jlu.edu.cn)

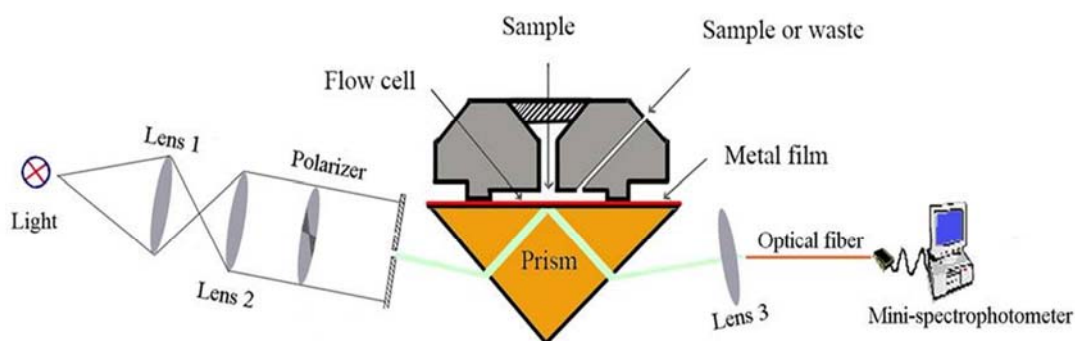

Figure S1. A diagram of SPR biosensor system designed in our laboratory.

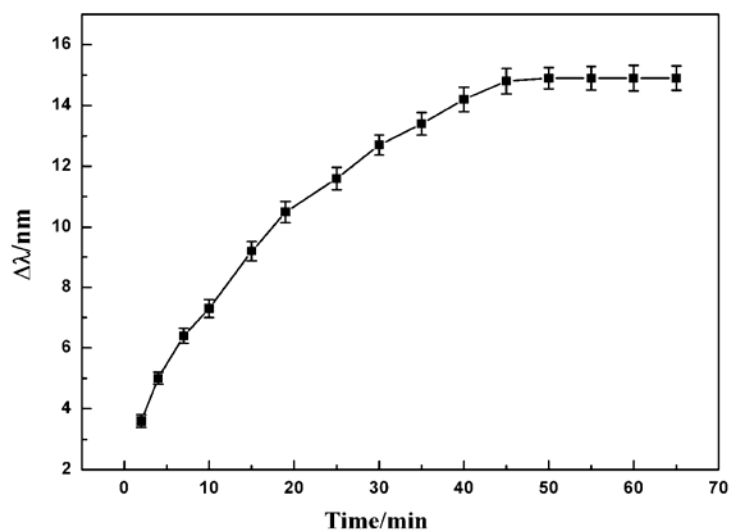

Figure S2. The kinetic adsorption curve of SPA-Au/GO composite on SPR Au film.

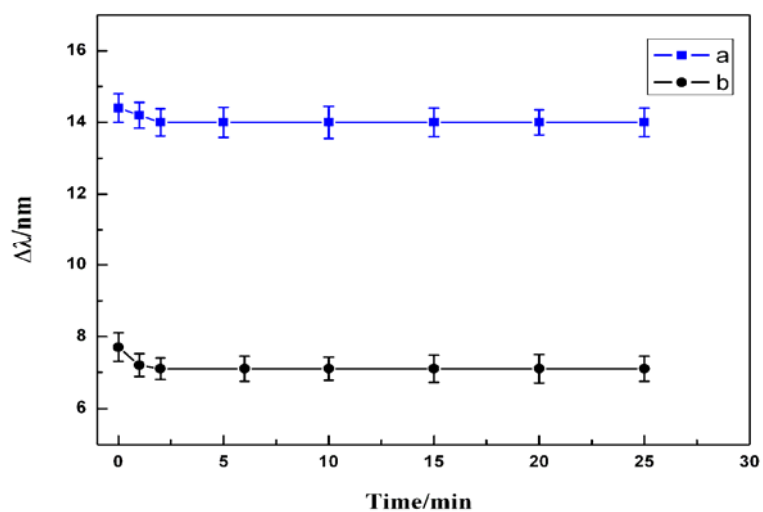

Figure S3. The shifts of the resonant wavelength for antibody immobilization after the injection of PBS on SPA-Au/GO modified Au film (curve a) and SPA modified Au film (curve b).
